# Supplementary material for: Response of the link between the El Niño–Southern Oscillation (ENSO) and the East Asian winter monsoon to Asian anthropogenic sulfate aerosols
Source: Copernicus journal article supplement (doi:10.5194/acp-25-8805-2025), 2025-08-13
Supplement: Supplementary file 1 [file acp-25-8805-2025-supplement.pdf]

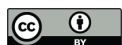

*Supplement of*

## **Response of the link between the El Niño–Southern Oscillation (ENSO) and the East Asian winter monsoon to Asian anthropogenic sulfate aerosols**

**Zixuan Jia et al.**

*Correspondence to:* Zixuan Jia (zx.jia@nuist.edu.cn)

The copyright of individual parts of the supplement might differ from the article licence.

# Supporting information

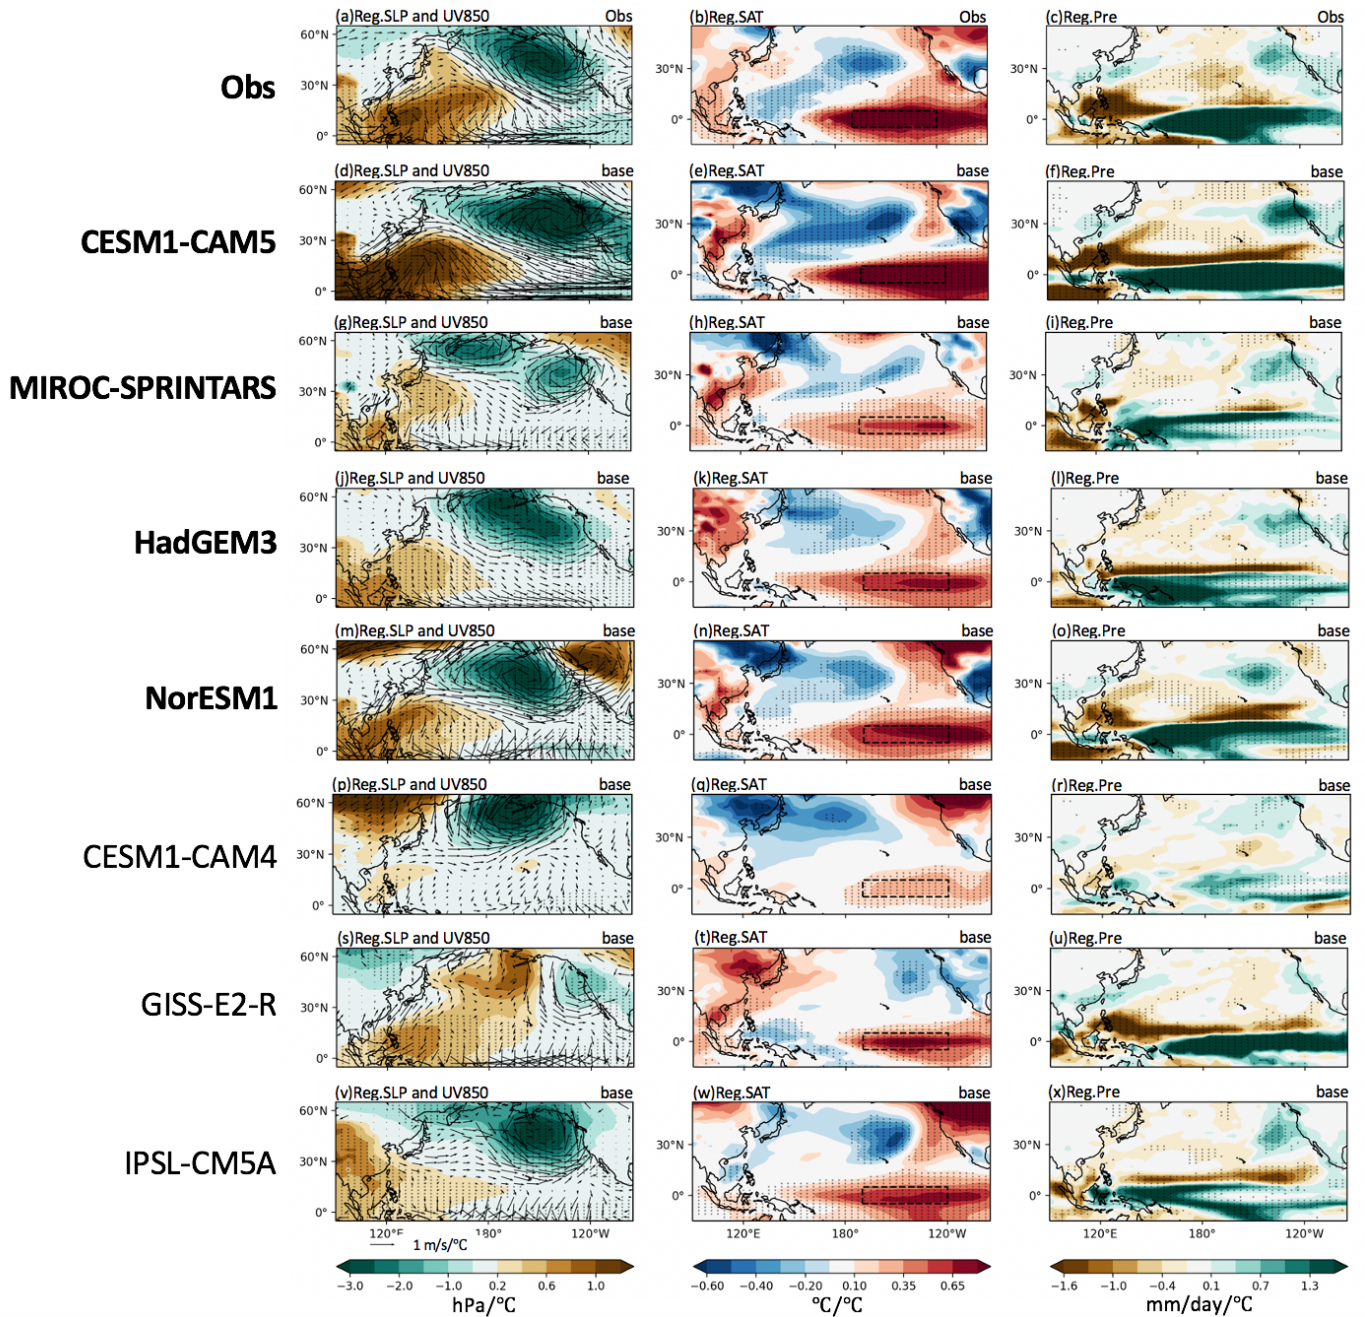

**Figure S1.** As in Figures 1a-c, and for (d-x) each model from the coupled baseline simulation in PDRMIP. Top four model names marked in bold are used in this study.

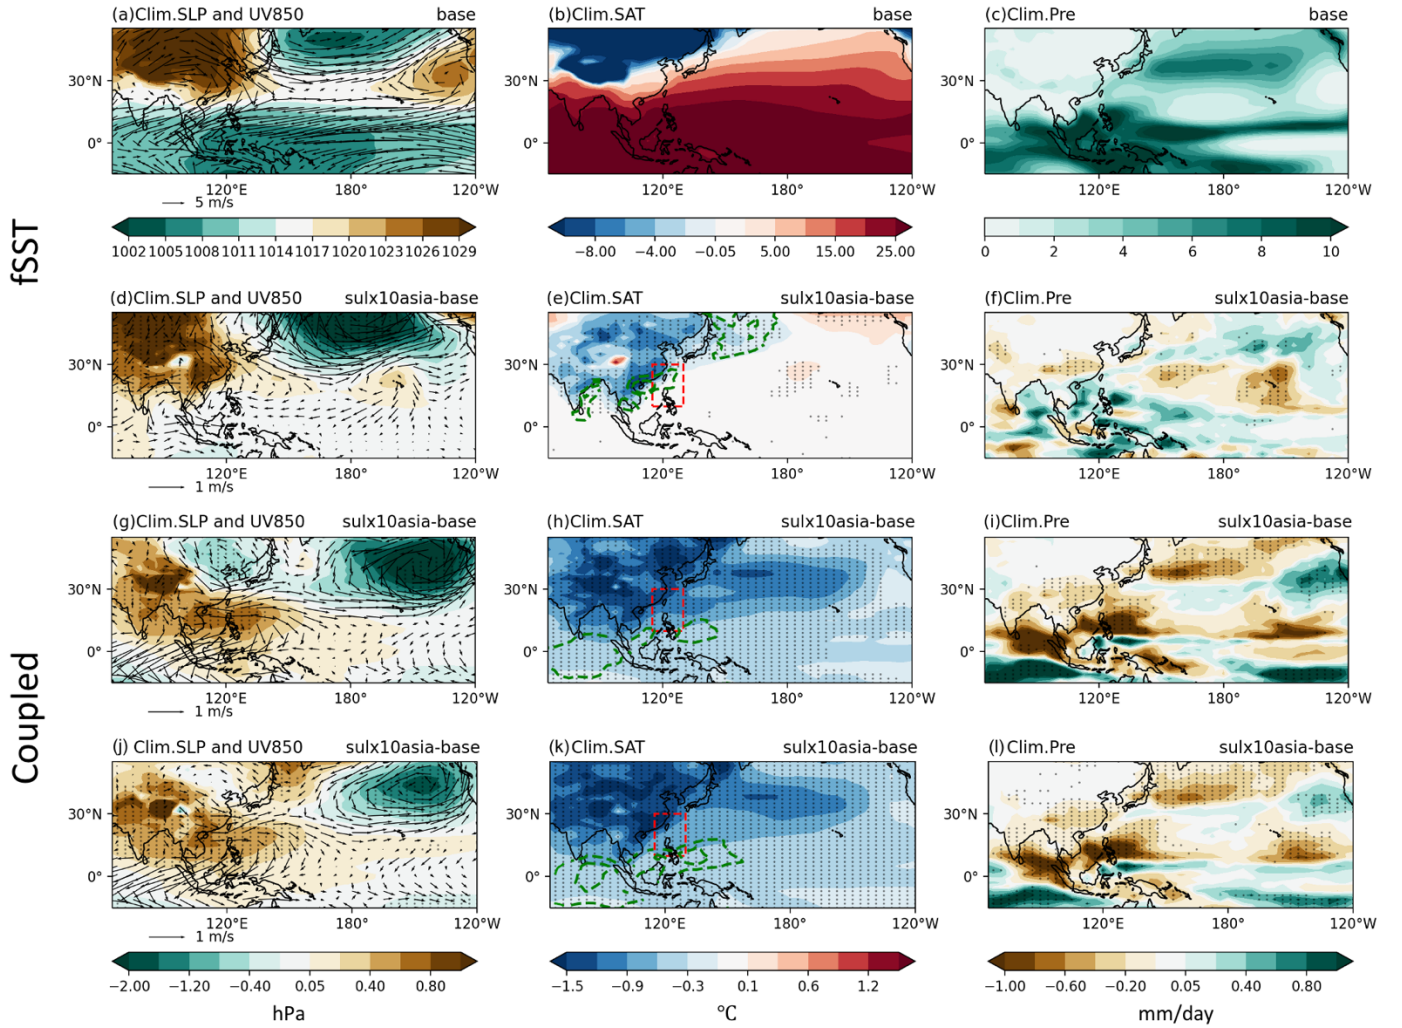

**Figure S2.** Top row: DJF multmodel mean of (a) sea level pressure (SLP; hPa, shading) and 850 hPa wind (UV850;  $\text{m s}^{-1}$ , vector), (b) surface air temperature (SAT, SST over the ocean,  $^{\circ}\text{C}$ , shading), (c) precipitation (Pre,  $\text{mm d}^{-1}$ ) from the PDRMIP fSST baseline simulations. Second row: DJF multmodel mean changes of (d) SLP and UV850, (e) SAT and 1000 hPa meridional wind (V1000,  $\text{m s}^{-1}$ , green contours, values plotted only when smaller than  $-0.1 \text{ m s}^{-1}$ ), (f) Pre between 5 SULx10Asia and baseline simulations in the PDRMIP fSST experiments. Bottom two rows: As panels (d-f), but for the PDRMIP coupled simulations during DJF for years 50-61 (g-i), for years 50-99 (j-l). Dotted regions indicate significant changes at the 95% level from the two-tailed Student's  $t$  test. The definition region of the EAWM index is marked by a red rectangle in the middle column (panels e, h and k).



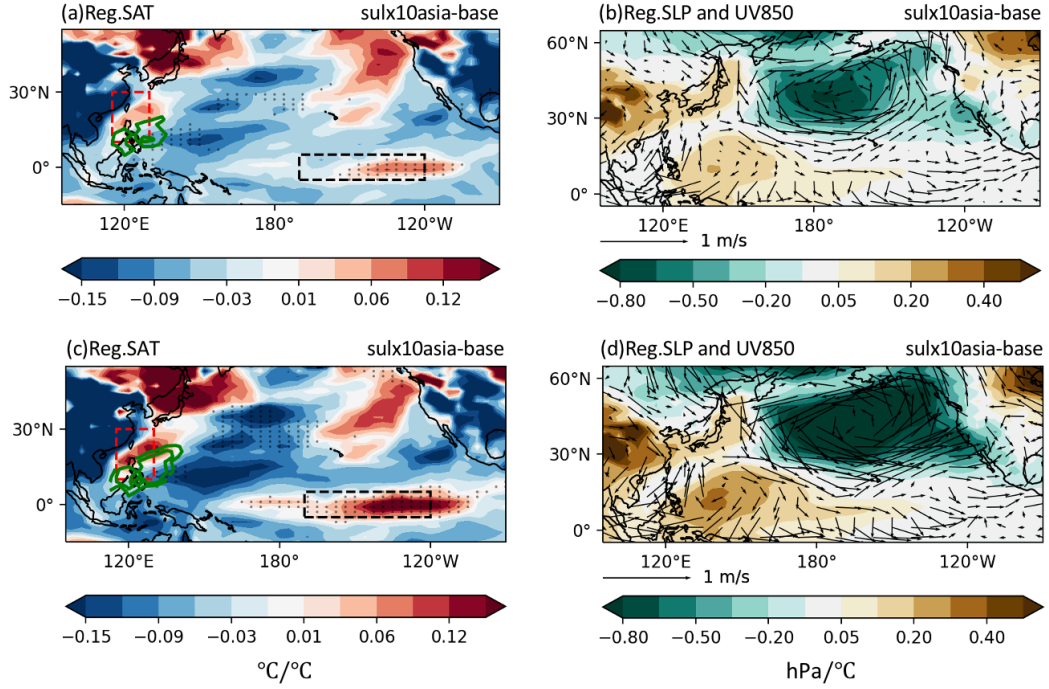

**Figure S3.** Differences in DJF multimodel regressions of (a, c) surface air temperature (SAT, SST over the ocean, °C, shading) and 1000 hPa meridional wind (V1000) over the broad East Asia (green contours, values plotted only when larger than  $0.05 \text{ m s}^{-1} \text{ }^{\circ}\text{C}^{-1}$ ), (b, d) sea level pressure (SLP; hPa, shading) and 850 hPa wind (UV850;  $\text{m s}^{-1}$ , vector) onto the (a, b) Niño3 index, (c, d) Niño4 index between coupled SUL×10Asia and baseline simulations. Dotted regions represent differences that remain significant after false discovery rate (FDR) correction of  $p$ -values from two-tailed Student's  $t$ -test (Wilks et al., 2016). The definition regions of the EAWM index and the Niño3.4 index are marked by red and black rectangles respectively.

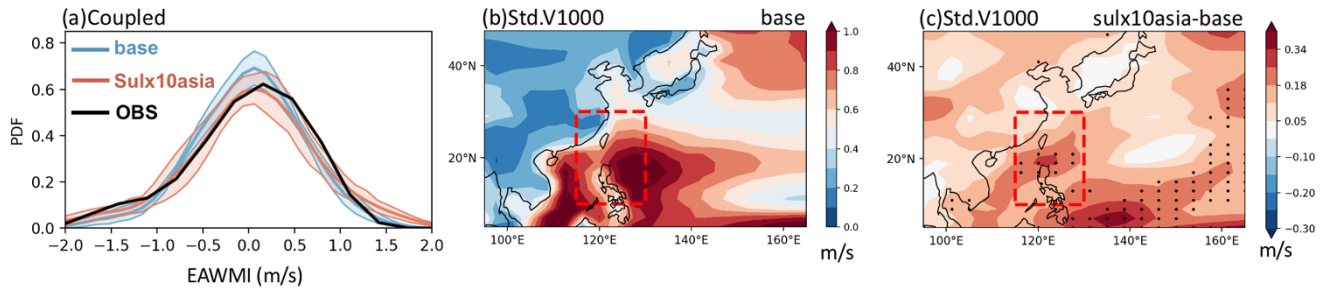

**Figure S4.** (a) Frequency distributions of the EAWM index from observations during DJF 1965-2014 (black curve) and (a) coupled simulations during DJF for years 50-99 in PDRMIP with multimodel-means (thick coloured curves) and the associated 95% confidence intervals (coloured shades). The confidence intervals are estimated from different models by using bootstrap resampling (e.g. Wang, 2001). (b) DJF multimodel mean standard deviations of V1000 ( $\text{m s}^{-1}$ ) from coupled  
5 baseline simulations. (c) Differences in DJF multimodel mean standard deviations of V1000 ( $\text{m s}^{-1}$ ) between coupled  
SULx10Asia and baseline experiments. Dotted regions indicate significant differences at the 95% level from the two-tailed *F*-test. The definition region of the EAWM index is marked by a red rectangle.

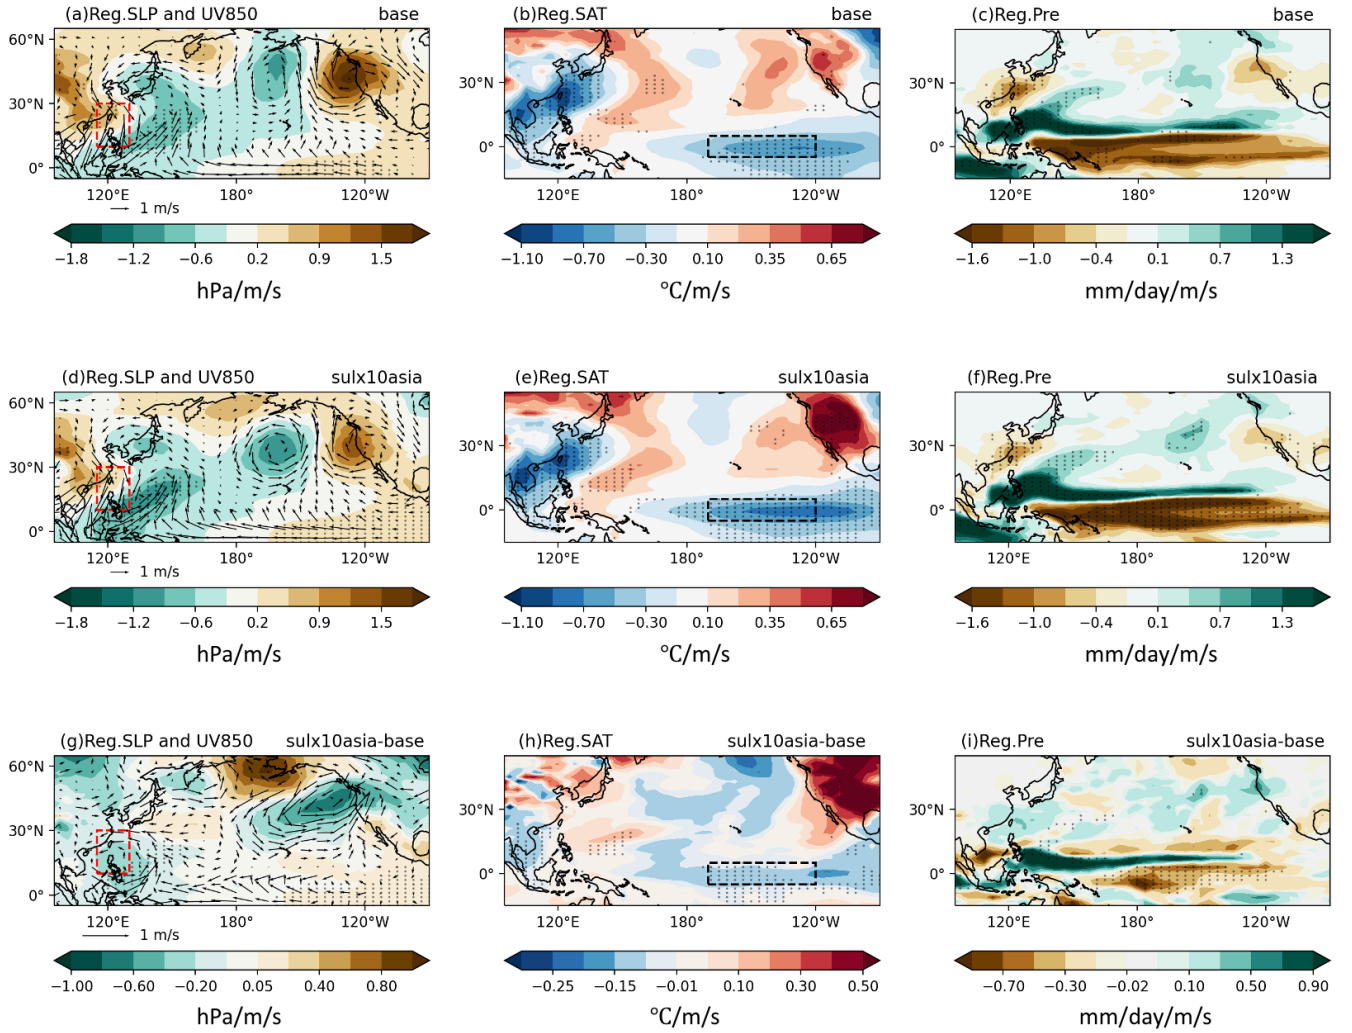

**Figure S5.** DJF multimodel mean regressions of (a)(d) SLP and UV850, (b)(e) SAT (SST over the ocean), (c)(f) Pre onto the EAWM index from coupled (a-c) baseline, (d-f) SUL×10Asia simulations in PDRMIP. Dotted regions indicate significant correlations at the 95% level from the two-tailed Student's  $t$  test. Differences in regressions of (g) SLP and UV850, (h) SAT (SST over the ocean), (i) Pre between coupled SUL×10Asia and baseline simulations. Dotted regions represent significant differences at the 95% level from the two-tailed Student's  $t$  test. The definition regions of the EAWM index and the Niño3.4 index are marked by red and black rectangles respectively.

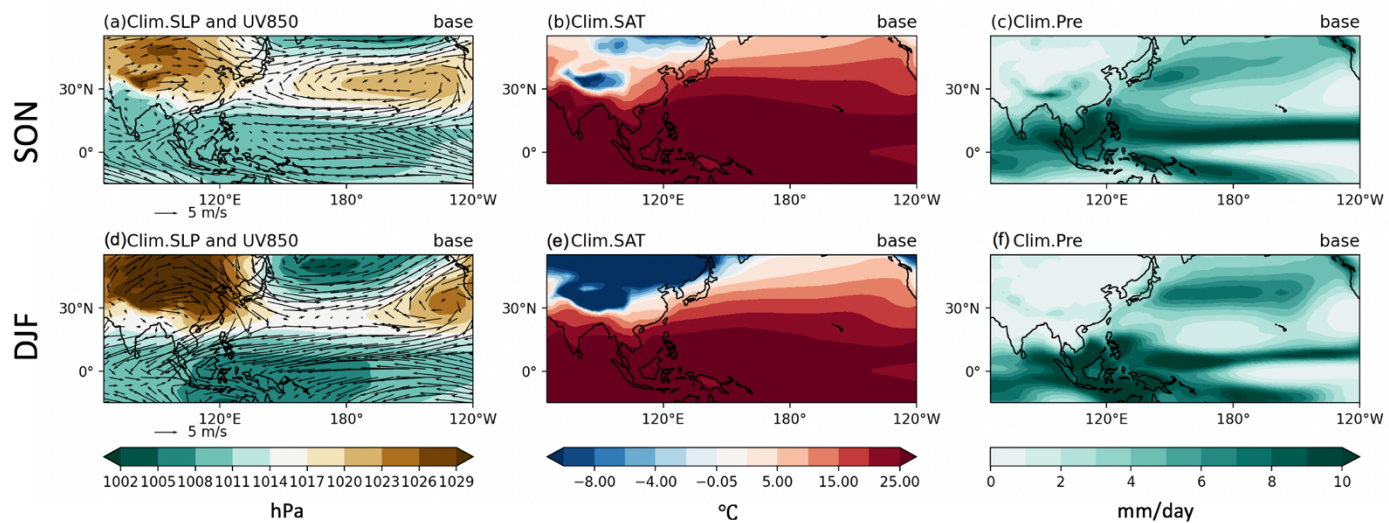

**Figure S6.** As in Figures S2a-c, but from coupled baseline simulations for (a-c) SON, (d-f) DJF.

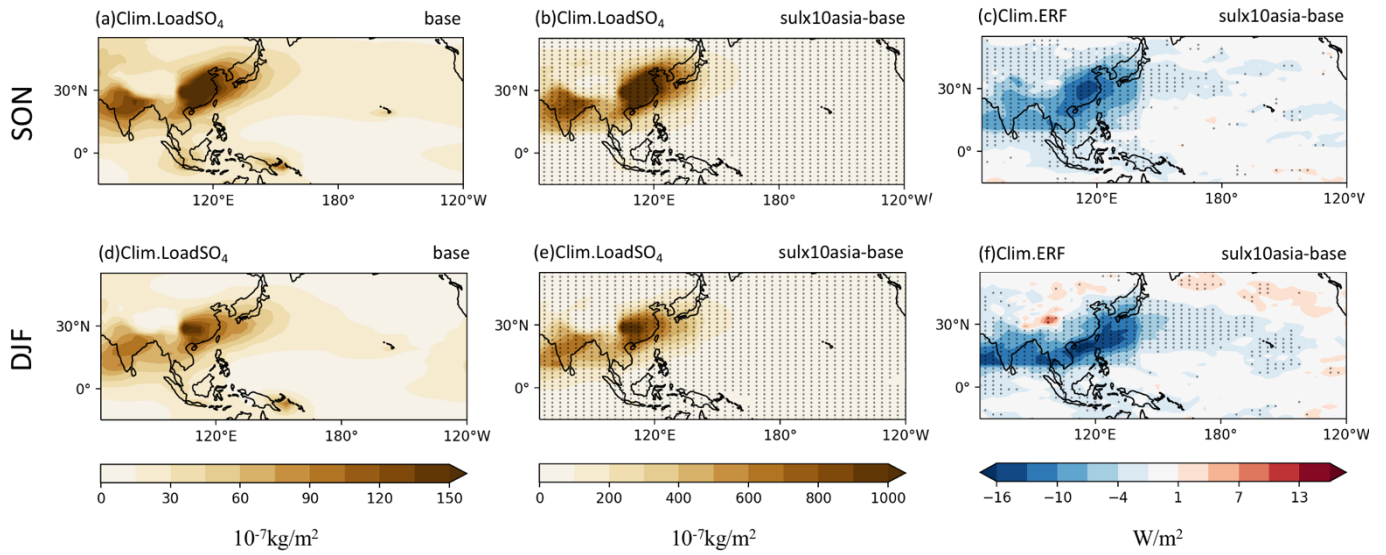

**Figure S7.** (a) SON, (d) DJF multimodel mean sulfate loading ( $10^{-7}\text{kg/m}^2$ ) from the PDRMIP fSST baseline simulations. Changes in (b, e) sulfate loading and (c, f) effective radiative forcing (ERF,  $\text{W/m}^2$ ) between fSST SUL $\times$ 10Asia and baseline simulations in these two seasons. Dotted regions indicate significant changes at the 95% level from the two-tailed Student's  $t$  test.
